# Supplementary material for: In Vivo Efficacy and Safety Evaluations of Therapeutic Splicing Correction Using U1 snRNA in the Mouse Retina
Source: MDPI journal article supplement (doi:10.3390/cells12060955), 2023-03-21
Supplement: s1 [file s1]

## Supplementary material

**Supplementary table S1: Primer sequences for off-target analyses.** Overview of genes containing potential off-target sites for U1.ad binding. The binding position within each gene is indicated by the exon/intron number containing the potential off-target site. Sequences of primers used for RT-PCR amplification are listed from 5' to 3'. The PCR product sizes for the wild-type and a potentially mis-spliced transcript are given in base pairs (bp).

| gene           | potential off-target U1 binding site | forward primer         | reverse primer           | RT-PCR fragment size (bp)<br>of the wild-type product | RT-PCR fragment size (bp)<br>of the predicted off-target product |
|----------------|--------------------------------------|------------------------|--------------------------|-------------------------------------------------------|------------------------------------------------------------------|
| <i>Ankrd35</i> | exon 14                              | ctgtgtgccctcaggg       | ccatctgtttctgcttttttcc   | 229                                                   | no band                                                          |
| <i>CFap54</i>  | exon 3                               | ctgccgtccaactattacaacg | ctgcatgatgagccgaaagg     | 336                                                   | 273                                                              |
| <i>Cfh</i>     | exon 22                              | gggaaatgtgggctcc       | gtatattagtcacatgcatgtgcc | 436                                                   | no band                                                          |
| <i>Fat3</i>    | exon 11                              | ccaccaggggaggtgg       | cctggcactgaccttcagg      | 352                                                   | 322                                                              |
| <i>Fat3</i>    | exon 15                              | cttacctcatccggtctgg    | gtccctatctccaccac        | 344                                                   | 257                                                              |
| <i>ldh3a</i>   | exon 5                               | ggaccaggaggaaagtgg     | ctcgaaggcaaactctgc       | 339                                                   | 279                                                              |
| <i>Lrp2</i>    | exon 25                              | gcctttcactgtcctagctc   | gtgtgggcagtgatattgtcc    | 441                                                   | 317                                                              |
| <i>Ahi1</i>    | intron 15                            | cgccgtgcgggactc        | gcagcttagggcaggtgc       | 312                                                   | 327                                                              |
| <i>Awat2</i>   | intron 3                             | cttactggcctgtcaccg     | gcctgtgtgtcagtggc        | 248                                                   | 260                                                              |
| <i>Eif4h</i>   | intron 2                             | cctacgacgatcgggcc      | gtcagagcctcctcaggg       | 283                                                   | 336                                                              |
| <i>Pex3</i>    | intron 9                             | gtccaggtcttcactgtgcc   | gggtcgaaagaattcgcc       | 217                                                   | 253                                                              |
| <i>Raf1</i>    | intron 16                            | gctgatggctggggagc      | ctcagtgtgagctgccc        | 277                                                   | 311                                                              |

**Supplementary table S2: Comparison of ONL thickness in central retinal slices by injected construct.** p-values of the comparison of ONL thickness at proximal (white text on dark grey background) and distal (black text on light grey background) regions between groups (*Opa1*<sup>+/+</sup>: white background, *Opa1*<sup>enu/+</sup>: black background) using Mann-Whitney U test with Bonferroni correction (corrected p-values are shown).

|                |       | non  | U1.wt | U1.ad | non   | GFP   | U1.wt | U1.ad |
|----------------|-------|------|-------|-------|-------|-------|-------|-------|
| ini. construct | non   | -    | 1     | 1     | 0.091 | 1     | 1     | 1     |
|                | U1.wt | 1    | -     | 1     | 0.667 | 1     | 1     | 1     |
|                | U1.ad | 1    | 1     | -     | 0.252 | 1     | 1     | 1     |
|                | non   | 0.64 | 1     | 1     | -     | 0.252 | 0.608 | 0.233 |
|                | GFP   | 1    | 1     | 1     | 0.88  | -     | 1     | 1     |
|                | U1.wt | 1    | 1     | 1     | 1     | 1     | -     | 1     |
|                | U1.ad | 1    | 1     | 1     | 1     | 1     | 1     | -     |



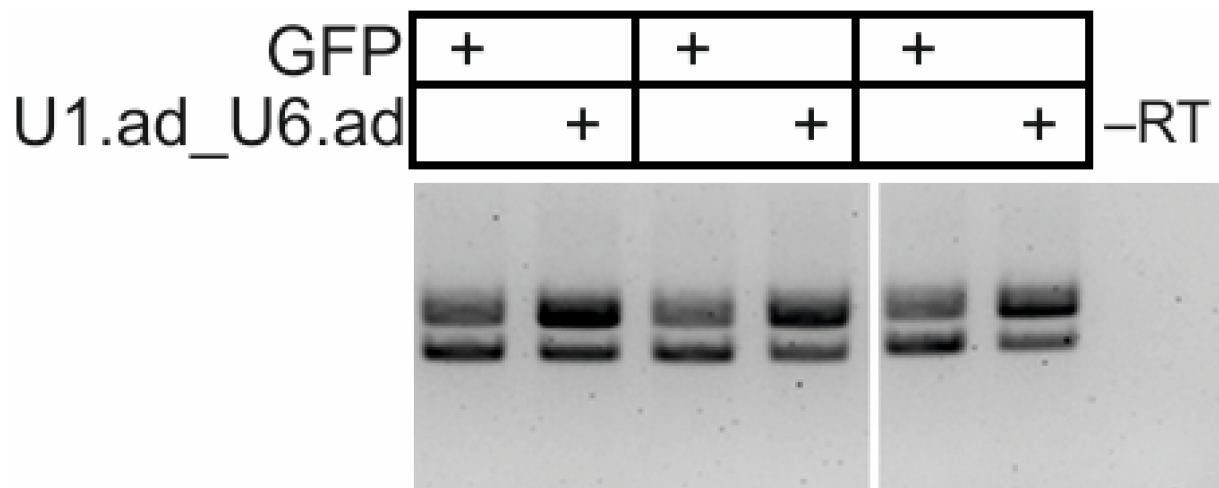

**Supplementary Figure S2.** RT-PCR analyses of *Opa1* splicing after treatment with engineered U1 and U6 in three *Opa1*<sup>enu/+</sup> mice. The larger RT-PCR fragment corresponds to the correctly spliced wild-type *Opa1*, the shorter corresponds to *Opa1* transcript skipping exon 10. Correctly spliced wild-type *Opa1* transcripts are increased upon injection of U1.ad\_U6.ad compared to the contralateral mock control (for quantification see Figure 1F).

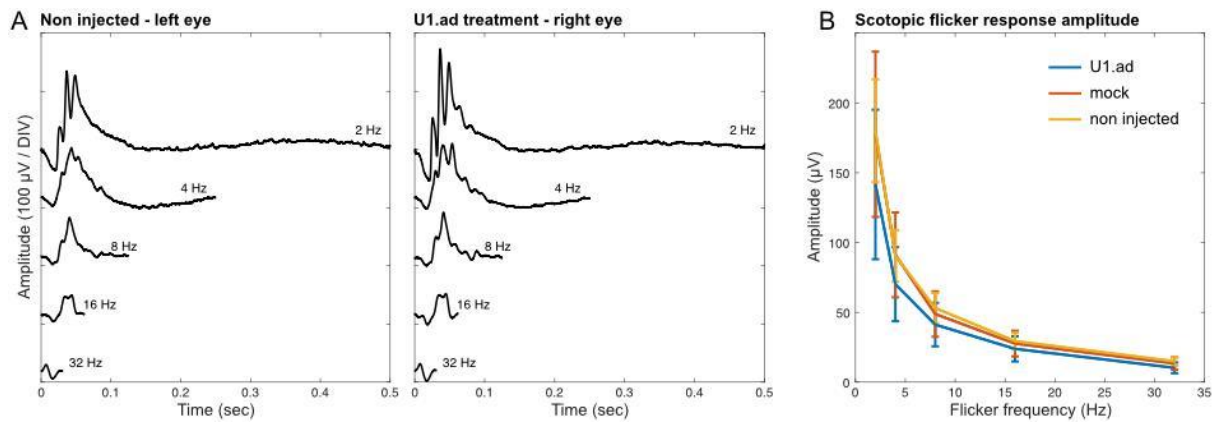

**Supplementary Figure S3.** U1-mediated side effects on retinal function were not detected by flicker electroretinography. **(A)** Representative scotopic ERG responses to flickering light of varying frequency. The intensity of the light flashes was  $3 \text{ cd}^*\text{s}/\text{m}^2$ . The left eye was untreated. The right eye was injected with engineered U1 (U1.ad). The ERGs of both eyes were recorded simultaneously. **(B)** Mean scotopic flicker ERG amplitudes. Error bars represent 95% confidence intervals (U1.ad:  $n=7$ , mock:  $n=9$ , non-injected:  $n=24$ ).
